# Supplementary material for: The role of supplementary environmental surveillance to complement acute flaccid paralysis surveillance for wild poliovirus in Pakistan – 2011–2013
Source: PubMed Central journal article supplement (PMC5526532; doi:10.1371/journal.pone.0180608), 2017-07-25
Supplement: pone.0180608.s001.pdf [file pone.0180608.s001.pdf]

**S1 Fig. Map of environmental sampling sites by year of establishment – Pakistan and Afghanistan, 2011-2013.**

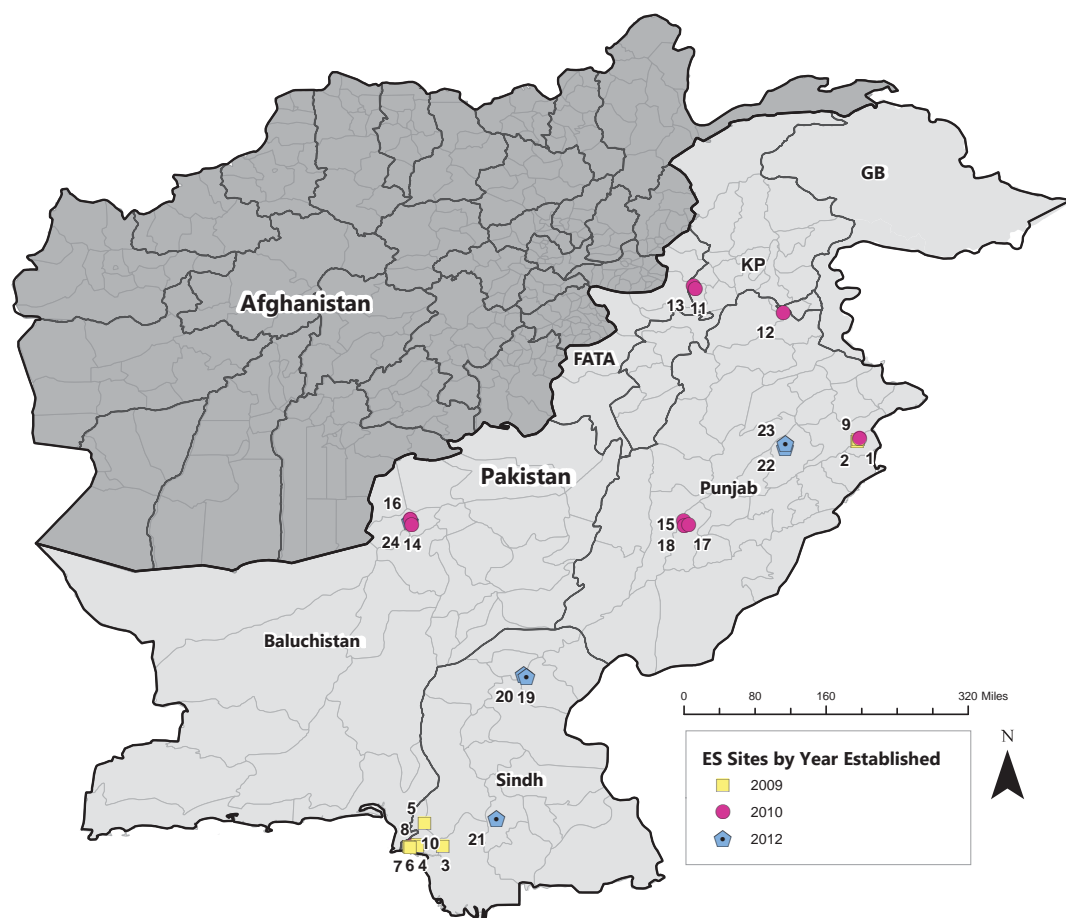

| #  | ENVIRONMENTAL SURVEILLANCE SITE NAME | PROVINCE (PAKISTAN) | DISTRICT                 | START YEAR | END YEAR |
|----|--------------------------------------|---------------------|--------------------------|------------|----------|
| 1  | GULSHAN RAVI STATION                 | PUNJAB              | LAHORE                   | 2009       | -        |
| 2  | MULTAN ROAD STATION                  | PUNJAB              | LAHORE                   | 2009       | -        |
| 3  | CHAKORA NULLA                        | SINDH               | KHI.GULSHAN-E-IQBAL TOWN | 2009       | -        |
| 4  | RASHID MINHAS RD LAY                 | SINDH               | KHI.GULSHAN-E-IQBAL TOWN | 2009       | -        |
| 5  | COMPOSITE SAMPLE                     | SINDH               | KHI.GADAP TOWN           | 2009       | -        |
| 6  | SAJJAN GOTH                          | SINDH               | KHI.BALDIA TOWN          | 2009       | -        |
| 7  | KUMHAR WARRA HUB RIV                 | SINDH               | KHI.BALDIA TOWN          | 2009       | 2010     |
| 8  | SOHRAB GOTH                          | SINDH               | KHI.GADAP TOWN           | 2009       | -        |
| 9  | OUTFALL STATION                      | PUNJAB              | LAHORE                   | 2010       | -        |
| 10 | BALDIA COMPOSITE                     | SINDH               | KHI.GADAP TOWN           | 2010       | -        |
| 11 | SHAHEEN TOWN                         | KHYBER PAKHTUNKHWA  | PESHAWAR                 | 2010       | -        |
| 12 | SAFDAR ABAD                          | PUNJAB              | RAWALPINDI               | 2010       | -        |
| 13 | LARA MA                              | KHYBER PAKHTUNKHWA  | PESHAWAR                 | 2010       | -        |
| 14 | JATAK KILLI & TAKHTHANI BY PASS      | BALOCHISTAN         | QUETTA                   | 2010       | -        |
| 15 | SURAJ MIANI                          | PUNJAB              | MULTAN                   | 2010       | -        |
| 16 | JAM-E-SALFIA                         | BALOCHISTAN         | QUETTA                   | 2010       | -        |
| 17 | ALI TOWN                             | PUNJAB              | MULTAN                   | 2010       | -        |
| 18 | KOTLA ABDUL FATAH                    | PUNJAB              | MULTAN                   | 2010       | -        |
| 19 | MIANI PUMPING STATION                | SINDH               | SUKKUR                   | 2012       | -        |
| 20 | MAKKA PUMPING STATION                | SINDH               | SUKKUR                   | 2012       | -        |
| 21 | TULSIDAS PUMPING STATION             | SINDH               | HYDERABAD                | 2012       | -        |
| 22 | FAISALABAD COMPOSITE SITE            | PUNJAB              | FAISALABAD               | 2012       | -        |
| 23 | ISMAIL PUMPING STATION               | PUNJAB              | FAISALABAD               | 2012       | -        |
| 24 | SUR PUL                              | BALOCHISTAN         | QUETTA                   | 2012       | -        |

**Abbreviations:** KP: Khyber Pakhtunkhwa; GB: Gilgit-Baltistan; FATA: Federally Administered Tribal Areas ES: Environmental Surveillance
